# Supplementary material for: Increased Jab1/COPS5 is associated with therapeutic response and adverse outcome in lung cancer and breast cancer patients
Source: PubMed Central journal article supplement (PMC5722579; doi:10.18632/oncotarget.22146), 2017-10-27
Supplement: oncotarget-08-97504-s001.pdf [file oncotarget-08-97504-s001.pdf]

## Increased Jab1/COPS5 is associated with therapeutic response and adverse outcome in lung cancer and breast cancer patients

### SUPPLEMENTARY MATERIALS

Supplementary Table 1: Characteristics of noncancerous and cancerous patients

| Variable | Lung cancer | Pneumonia  | P    | Breast cancer | Hyperplasia | P    |
|----------|-------------|------------|------|---------------|-------------|------|
| Age      |             |            |      |               |             |      |
| <60      | 39(44.3%)   | 8(47.1%)   | 0.99 | 64(84.2%)     | 12(75%)     | 0.47 |
| ≥60      | 49(55.7%)   | 9(52.9%)   |      | 12(15.8%)     | 4(25%)      |      |
| Sex      |             |            |      |               |             |      |
| M        | 67(76.1%)   | 11(64.7%)  | 0.37 |               |             |      |
| F        | 21(23.9%)   | 6 (35.3%)  |      |               |             |      |
| Smoking  |             |            |      |               |             |      |
| No       | 37 (42.0%)  | 11 (64.7%) | 0.11 |               |             |      |
| Yes      | 51(58.0%)   | 6 (35.3%)  |      |               |             |      |
